# Supplementary material
Source: PubMed Central journal article supplement (PMC6854342)
Supplement: plantbiotechnology-36-3-19.0814a-s001.pdf [file plantbiotechnology-36-3-19.0814a-s001.pdf]

**Supplementary Table S1. Pollen germination<sup>a</sup>.**

| Sample                                             | Sucrose <sup>b</sup> | Pollen germination <sup>cd</sup> |         |         |
|----------------------------------------------------|----------------------|----------------------------------|---------|---------|
|                                                    |                      | 3 days                           | 10 days | 15 days |
| <i>Oncidium</i><br>"Honey Angel"<br>MF-1           | 0%                   | —                                | —       | —       |
|                                                    | 1%                   | —                                | —       | —       |
|                                                    | 2%                   | —                                | —       | —       |
|                                                    | 3%                   | —                                | —       | —       |
|                                                    | 10%                  | —                                | —       | —       |
| <i>Oncidium</i><br><i>Sphacelatum</i> <sup>e</sup> | 0%                   | —                                | +       | ++      |
|                                                    | 1%                   | +                                | +       | +++     |
|                                                    | 2%                   | +                                | ++      | +++     |
|                                                    | 3%                   | ++                               | +++     | +++     |
|                                                    | 10%                  | +                                | +       | +++     |

<sup>a</sup> The medium of Brewbaker and Kwack (1963) (BK medium) was used as the basal composition. To this were added various concentrations of sucrose from 0 to 10%, or stigma extract (0.2%). Pollens incubated in the tested medium were placed in the dark at 25°C. The germination rate was checked at 3, 10, and 15 days.

<sup>b</sup> Sucrose contents cosupplied to BK medium.

<sup>c</sup> Pollen germination was observed at 3, 10, and 15 days after incubation.

<sup>d</sup> -, +, ++, and +++ indicate none, a few, half, and most of the pollens were germinated, respectively.

<sup>e</sup> *Oncidium sphacelatum* is a wild species and has been one of the breeding parents of *Oncidium* Gower Ramsey, used as a control.
